# Supplementary material for: Application of Phytosociological Information in the Evaluation of the Management of Protected Areas
Source: MDPI journal article supplement (doi:10.3390/plants12020406), 2023-01-15
Supplement: s1 [file s1]

# Supplementary Materials

Table S1. Values of all calculated indices.

| APs | LPI  | STD  | RRF  | PCA  | DRA  |
|-----|------|------|------|------|------|
| AMC | 1.97 | 4.10 | 0.07 | 1.63 | 0.63 |
| BCA | 2.57 | 2.21 | 2.96 | 3.82 | 3.27 |
| BMB | 2.05 | 1.48 | 2.27 | 1.31 | 1.98 |
| CGN | 3.15 | 2.94 | 2.79 | 3.16 | 3.08 |
| DEG | 0.78 | 2.75 | 0.42 | 1.31 | 0.63 |
| DOÑ | 4.31 | 2.29 | 2.96 | 3.82 | 3.28 |
| DUA | 0.71 | 0.99 | 1.18 | 1.52 | 1.05 |
| EPU | 1.08 | 0.26 | 1.38 | 1.31 | 1.05 |
| EST | 2.34 | 2.45 | 2.15 | 1.52 | 2.08 |
| MFR | 1.67 | 1.91 | 2.50 | 1.41 | 2.26 |
| MIC | 1.64 | 1.83 | 2.79 | 1.31 | 2.46 |
| MOD | 2.25 | 1.91 | 2.87 | 1.41 | 2.57 |
| PES | 2.58 | 2.39 | 2.69 | 3.16 | 2.92 |
| TTR | 0.89 | 0.48 | 0.96 | 1.31 | 0.73 |

Abbreviations: AMC, Acantilados de Maro-Cerro Gordo; BCA, Bahía de Cádiz; BMB, La Breña y Marismas de Barbate; CGN, Cabo de Gata-Níjar; DEG, Desembocadura de Guadalhorce; DOÑ, Doñana; DUA, Dunas de Artola; EPU, Enebrales de Punta Umbría; EST, Estrecho; MIC, Marismas de Isla Cristina; MOD, Marismas del Odiel; MRF, Marismas del Río Piedras y Flecha del Rompido; PES, Punta Entinas-Sabinar; TTR, Tómbolo de Trafalgar. LPI: Legal Protection Index; STD: Syntaxonomic Distinctness; RRF: Rarefaction Index; PCA: Priority Conservation Areas; DRA: acronym for Distinctiveness, Rarefaction and Area Prioritisation.

Table S2. Distribution of communities by protected areas.

| CLAS   | ORD    | ALLI   | ASOC    | AMC | BCA | BMB | CGN | DEG | DOÑ | DUA | EPU | EST | MIC | MOD | MRF | PES | TTR |
|--------|--------|--------|---------|-----|-----|-----|-----|-----|-----|-----|-----|-----|-----|-----|-----|-----|-----|
| Cakmar | Caklia | Cakion | HypGla  |     |     |     | +   |     |     |     |     |     |     |     |     | +   |     |
| Cakmar | Caklia | Cakion | SalCak  |     | +   |     | +   | +   | +   | +   | +   | +   | +   | +   | +   | +   | +   |
| CisLav | StaHal | Coralb | CisSal  |     | +   |     |     |     |     |     |     |     |     |     |     |     |     |
| CisLav | StaHal | Coralb | FumCis  |     |     |     |     |     | +   |     | +   |     |     | +   |     |     |     |
| CisLav | StaHal | Coralb | HalSta  |     | +   | +   |     |     |     |     |     |     |     |     |     |     |     |
| CisLav | StaHal | Coralb | ThyAlb  |     |     |     | +   |     |     |     |     |     |     |     |     | +   |     |
| Cretea | Cralia | Cdnion | Limemar | +   |     |     |     |     |     |     |     |     |     |     |     |     |     |
| Cretea | Cralia | Clnion | CriLim  |     |     |     | +   |     |     |     |     |     |     |     |     |     |     |
| Cretea | Cralia | Clnion | LimLyc  |     |     |     |     |     |     |     |     | +   |     |     |     |     |     |
| CytSco | Cyalia | Retmon | PycRet  |     |     | +   |     |     |     | +   |     |     |     |     |     |     |     |
| EupAmm | Amalia | Amlion | LotAmm  |     | +   |     | +   | +   | +   | +   | +   | +   | +   | +   | +   | +   | +   |
| EupAmm | Amalia | HonEly | CypEly  |     |     |     | +   | +   |     | +   |     |     |     |     |     | +   |     |
| EupAmm | Amalia | HonEly | EupEly  |     | +   | +   |     |     | +   |     | +   | +   | +   | +   | +   |     | +   |
| EupAmm | Amalia | Spoare | ErySpo  |     |     |     | +   |     |     |     |     |     |     |     |     | +   |     |
| EupAmm | Amalia | Spoare | Spoari  |     |     |     |     |     |     | +   |     |     |     |     |     |     |     |
| EupAmm | Crulia | Cruion | LotCru  |     |     |     | +   |     |     | +   |     |     |     |     |     | +   |     |
| EupAmm | Crulia | Hesion | ArtArm  |     | +   |     |     |     | +   |     | +   | +   | +   | +   | +   |     | +   |
| HalTha | ThaSyr | SyrTha | Cymnod  |     | +   |     | +   |     |     |     |     | +   |     |     |     |     |     |
| Juetea | Jualia | Jucion | ElyJun  |     | +   | +   |     |     | +   |     |     | +   | +   |     | +   |     |     |
| Juetea | Jualia | Jucion | PolJun  |     |     |     | +   |     | +   |     |     |     |     | +   |     | +   |     |
| MagPhr | Boalia | Bolion | BolJun  |     |     |     | +   |     |     |     |     |     |     |     |     | +   |     |
| NerTam | Tamlia | Tamafr | PolTam  |     |     |     | +   |     |     |     |     |     |     |     |     | +   |     |
| NerTam | Tamlia | Tambov | InuTam  | +   |     |     |     |     |     |     |     |     |     |     |     |     |     |
| Paetea | Paalia | Lavmar | Rostom  | +   |     |     |     |     |     |     |     |     |     |     |     | +   |     |
| PegSal | SalPeg | SalSua | FraSal  |     |     |     |     | +   | +   |     |     |     |     |     |     |     |     |
| PegSal | SalPeg | SalSua | WhiLyc  |     |     |     |     |     |     |     |     | +   |     |     |     |     |     |

|        |        |        |        |   |   |   |   |   |   |   |   |   |   |   |   |   |   |
|--------|--------|--------|--------|---|---|---|---|---|---|---|---|---|---|---|---|---|---|
| Poetea | Poalia | Ponion | Posoce | + |   |   | + |   |   |   |   |   |   |   |   |   |   |
| Quetea | PisRha | AspRha | CneBux | + |   |   |   |   |   |   |   |   |   |   |   |   |   |
| Quetea | PisRha | Juntur | ChaJun |   |   | + |   |   | + |   | + | + |   |   |   |   |   |
| Quetea | PisRha | Juntur | OsyJun |   |   |   |   |   |   |   |   |   |   |   |   | + |   |
| Quetea | PisRha | Juntur | RanJun |   | + | + |   |   | + |   | + | + |   | + | + |   | + |
| Quetea | PisRha | Juntur | RolJun |   | + |   |   |   |   |   |   |   |   |   |   |   |   |
| Quetea | PisRha | Perang | Zizlot |   | + | + |   |   | + | + | + | + |   | + | + |   | + |
| Quetea | PisRha | Rution | RubCor |   | + | + |   |   | + | + | + | + | + | + | + |   | + |
| Quetea | Quelia | QueOle | AroQue |   |   |   | + |   |   |   |   |   |   |   |   |   |   |
| Rosoff | Antter | ThySid | TeuHel |   | + | + |   |   |   | + | + | + | + | + | + |   |   |
| Saetea | Lialia | Limcon | Limfer |   | + | + |   |   | + |   |   |   | + | + | + |   |   |
| Saetea | Lialia | Limmon | PolLim |   |   |   | + |   |   |   |   |   |   |   |   | + |   |
| Saetea | Lialia | LygLim | Limang |   |   |   |   |   | + |   |   |   | + | + | + |   |   |
| Saetea | ArtSua | Artgla | ArtSar |   |   |   | + |   |   |   |   |   |   |   |   | + |   |
| Saetea | SarHal | Sarcon | HalSar |   | + | + |   | + | + |   |   |   | + | + | + |   |   |
| Saetea | ArtSua | Artgla | InuArt |   | + | + |   |   | + |   |   |   |   |   |   |   |   |
| Saetea | SarHal | Sarcon | Saralp |   | + | + |   |   |   |   |   |   | + | + | + |   |   |
| Saetea | SarHal | Halpor | CisSar |   | + | + |   |   | + |   | + |   |   | + | + |   |   |
| Saetea | Sarlia | Sarion | LimSar |   |   |   | + |   |   |   |   |   |   |   |   |   |   |
| Saetea | SarHal | Halpor | SarPuc |   | + | + |   |   | + |   | + |   |   | + | + |   |   |
| Saetea | Sarlia | Suaver | CisSua |   | + | + |   |   | + |   |   |   |   | + | + |   |   |
| Saetea | Sarlia | Suaver | FraSua |   | + | + |   |   | + |   |   |   | + | + | + |   |   |
| Sagmar | Fralia | Fraion | ParFra |   |   |   |   |   | + |   |   |   |   |   |   |   |   |
| Sagmar | Fralia | Hormar | HaiLop |   | + | + |   |   | + |   |   |   | + | + | + |   |   |
| Spetea | Spalia | Spaion | Spaden |   | + | + |   |   |   |   |   |   | + | + | + |   |   |
| Spetea | Spalia | Spaion | Spamar |   |   |   |   |   | + |   |   |   | + | + | + |   |   |
| Thetea | Sualia | Theion | Salsod |   |   |   |   |   |   |   |   |   |   |   |   | + |   |
| Thetea | Tsalia | Salpat | Suaspi |   | + |   |   |   | + |   |   |   | + | + | + |   |   |
| Thetea | Tsalia | Salpat | Suasal |   |   |   |   |   |   |   |   |   | + |   | + |   |   |

|        |        |        |        |  |   |  |   |   |   |   |  |   |  |  |   |   |   |
|--------|--------|--------|--------|--|---|--|---|---|---|---|--|---|--|--|---|---|---|
| Tubgut | Cutmar | AlkMar | WalLoe |  |   |  | + |   |   |   |  |   |  |  |   | + |   |
| Tubgut | Cutmar | Linped | OnoLin |  | + |  |   | + |   | + |  | + |  |  | + |   | + |
| Tubgut | Cutmar | Linped | TriSil |  |   |  | + |   |   |   |  |   |  |  |   | + |   |
| Tubgut | Maalia | AntMal | LinLoe |  |   |  |   |   | + |   |  |   |  |  |   |   |   |
| ZonMar | Zoalia | Zorion | Zosnol |  |   |  | + |   |   |   |  |   |  |  |   |   |   |

Abbreviations: CLAS, class; ORD, order; ALLI, alliance. Note: + indicates the presence of those categories in that protected area.

## Section S1. Description of Legal Protection Index (LPI).

In order to evaluate the "legal protection" of PAs, the "degree of legal protection" has been considered, on a decimal scale, based on the level of legal requirements and the protection effort in each figure [8]. Generally, the same protected area usually has more than one figure (overlapping) that reinforces the protective character, while at the same time it must have territorial management tools, such as the Natural Resources Management Plan (PORN) or the Use and Management Master Plan (PRUG).

The algorithm proposed by Salvo Tierra et al. (2020) [24] is used to calculate the Legal Protection Index (IPL):

$$LPI_{(0-10)} = (VSP * \log_{10} AP \text{ surface in Ha}) * RL \quad (4)$$

Where  $VSP$  (protection overlap value) would correspond to the sum of the values of the degree of legal protection, according to the previously established scale, of administratively declared figures that overlap in the same PA.

The  $RL$  (legal stringency) would be estimated using the following algorithm:

$$RL = nNP + \left( \frac{PORN}{2} + \frac{PRUG}{2} \right) \quad (5)$$

Where  $nNP$  corresponds to the number of protective standards that overlap over a PA.
